# Supplementary material
Source: PubMed Central journal article supplement (PMC5743029)
Supplement: Supp_Table1.pdf [file Supp_Table1.pdf]

## Supplementary Data

**Supplementary Table S1. Median Response for Weight-Related Questionnaire Items**

| Questionnaire item                        | Median response value |
|-------------------------------------------|-----------------------|
| Fruit servings per day                    | 2 servings            |
| Vegetable servings per day                | 2 servings            |
| Breakfast                                 | 5 times per week      |
| Milk                                      | 4–6 times per week    |
| Soft drinks                               | 1–3 times per week    |
| High-energy snacks                        | 1–3 times per week    |
| Takeaway food                             | 2–3 times per month   |
| Weekday afterschool activity <sup>a</sup> | 2 days out of 5       |
| Weekend activity <sup>a</sup>             | 2–3 times per weekend |
| Activity <sup>b</sup> during lunch        | Standing              |
| Weekday TV hours                          | 1–2 hours per day     |
| Weekend TV hours                          | 2–4 hours per day     |
| Weekday computer/video game hours         | 1–2 hours per day     |
| Weekend computer/video game hours         | 2–4 hours per day     |

<sup>a</sup>Activity includes sports, dance, or playing games in which adolescents were active

<sup>b</sup>Primary lunch activity (when not eating lunch) options included sitting down, standing up, and running, or being physically active a little, quite a bit, or most of the time.
